# Supplementary material for: Deproto-metallation of N-arylated pyrroles and indoles using a mixed lithium–zinc base and regioselectivity-computed CH acidity relationship
Source: PubMed Central journal article supplement (PMC4578368; doi:10.3762/bjoc.11.160), 2015-08-24
Supplement: Beilstein_J_Org_Chem-11-1475-s001.pdf [file Beilstein_J_Org_Chem-11-1475-s001.pdf]

## Supporting Information

for

### Deproto-metallation of N-arylated pyrroles and indoles using a mixed lithium–zinc base and regioselectivity-computed CH acidity relationship

Mohamed Yacine Ameer Messaoud<sup>1,2</sup>, Ghenia Bentabed-Ababsa<sup>\*2</sup>, Madani Hedidi<sup>1,2</sup>, Aïcha Derdour<sup>2</sup>, Floris Chevallier<sup>1</sup>, Yury S. Halauko<sup>\*3</sup>, Oleg A. Ivashkevich<sup>3</sup>, Vadim E. Matulis<sup>4</sup>, Laurent Picot<sup>\*5</sup>, Valérie Thiéry<sup>\*5</sup>, Thierry Roisnel<sup>6</sup>, Vincent Dorcet<sup>6</sup> and Florence Mongin<sup>\*1</sup>

Address: <sup>1</sup>Equipe Chimie et Photonique Moléculaires, Institut des Sciences Chimiques de Rennes, UMR 6226, CNRS-Université de Rennes 1, Bâtiment 10A, Case 1003, Campus de Beaulieu, 35042 Rennes, France, <sup>2</sup>Laboratoire de Synthèse Organique Appliquée, Faculté des Sciences, Université d'Oran 1 Ahmed Ben Bella, BP 1524 El M'Naouer, 31000 Oran, Algeria, <sup>3</sup>UNESCO Chair of Belarusian State University, 14 Leningradskaya Str., Minsk, 220030, Belarus, <sup>4</sup>Research Institute for Physico-Chemical Problems of Belarusian State University, 14 Leningradskaya Str., Minsk, 220030, Belarus, <sup>5</sup>Laboratoire Littoral Environnement et Sociétés, UMRi CNRS 7266, Université de La Rochelle, 17042 La Rochelle, France, and <sup>6</sup>Centre de Diffractométrie X, Institut des Sciences Chimiques de Rennes, UMR 6226, CNRS-Université de Rennes 1, Bâtiment 10B, Campus de Beaulieu, 35042 Rennes, France

Email: Ghenia Bentabed-Ababsa\* - [badri\\_sofi@yahoo.fr](mailto:badri_sofi@yahoo.fr); Yury S. Halauko\* - [hys@tut.by](mailto:hys@tut.by); Laurent Picot\* - [laurent.picot@univ-lr.fr](mailto:laurent.picot@univ-lr.fr); Valérie Thiéry\* - [valerie.thiery@univ-lr.fr](mailto:valerie.thiery@univ-lr.fr); Florence Mongin\* - [Florence.mongin@univ-rennes1.fr](mailto:Florence.mongin@univ-rennes1.fr)

\*Corresponding author

**Experimental description of the synthesized compounds, <sup>1</sup>H and <sup>13</sup>C NMR spectra, calculated values of the Gibbs energies  $\Delta G_{\text{acid}}$  [kcal·mol<sup>-1</sup>] for deprotonation, selected Cartesian coordinates of molecular geometry for the most stable rotamer forms optimized at B3LYP/6-31G(d) level of theory**

## Table of Contents

|                                                                                                                                                                                                                                |     |
|--------------------------------------------------------------------------------------------------------------------------------------------------------------------------------------------------------------------------------|-----|
| Experimental descriptions of the synthesized compounds.....                                                                                                                                                                    | S3  |
| <sup>1</sup> H and <sup>13</sup> C NMR spectra of compounds <b>3a</b> , <b>4a</b> , <b>3b</b> , <b>4d'</b> , <b>3e</b> , <b>4e</b> , <b>4c</b> , <b>3d</b> ,<br><b>4d</b> , <b>5b</b> , <b>5d</b> and <b>6d</b> .....          | S10 |
| Calculated values of the Gibbs energies $\Delta_{\text{acid}}G$ [kcal mol <sup>-1</sup> ] for deprotonation<br>at the corresponding positions of the investigated compounds .....                                              | S22 |
| Cartesian coordinates of molecular geometries for most stable rotamer form<br>of selected compounds (on example of <b>1b</b> and <b>2b</b> , neutral molecule,<br>gas phase) optimized at B3LYP/6-31G(d) level of theory ..... | S23 |

***N*-(2-Thienyl)pyrrole (1a)** [1]. The procedure 1 (16 h reaction time) using pyrrole (0.42 mL) and 2-iodothiophene (0.44 mL) (or 2-bromothiophene (0.39 mL)) gave **1a** (eluent: heptane-CH<sub>2</sub>Cl<sub>2</sub> 95:5) in 75% (20%) yield as a beige powder: mp 57 °C; <sup>1</sup>H NMR (CDCl<sub>3</sub>) δ 6.33 (t, 2H, *J* = 2.1 Hz), 6.91 (dd, 1H *J* = 3.6 and 1.5 Hz), 6.93-6.97 (m, 1H), 6.99 (d, 1H, *J* = 1.5 Hz), 7.01 (t, 2H, *J* = 2.1 Hz); <sup>13</sup>C NMR (CDCl<sub>3</sub>) δ 110.5 (2CH), 115.6 (CH), 119.2 (2CH), 121.4 (CH), 126.2 (CH), 144.3 (C).

***N*-(3-Pyridyl)pyrrole (1b)** [2]. The procedure 1 (32 h reaction time) using pyrrole (0.42 mL) and 3-iodopyridine (0.82 g) (or 3-bromopyridine (0.39 mL)) gave **1b** (eluent: heptane-AcOEt 80:20) in 65% (26%) yield as a yellow oil: <sup>1</sup>H NMR (CDCl<sub>3</sub>) δ 6.38 (t, 2H, *J* = 2.1 Hz), 7.07 (t, 2H, *J* = 2.3 Hz), 7.31 (dd, 1H *J* = 8.1 and 4.8 Hz), 7.64 (ddd, 1H, *J* = 8.4, 2.7 and 1.5 Hz), 8.47 (d, 1H, *J* = 4.5 Hz), 8.72 (d, 1H, *J* = 2.1 Hz); <sup>13</sup>C NMR (CDCl<sub>3</sub>) δ 111.4 (2CH), 119.0 (2CH), 123.9 (CH), 127.3 (CH), 136.9 (C), 141.9 (CH), 146.7 (CH).

***N*-(4-Methoxyphenyl)pyrrole (1d)** [3]. The procedure 1 (72 h reaction time) using pyrrole (0.42 mL) and 4-iodoanisole (0.94 g) gave **1d** (eluent: heptane-CH<sub>2</sub>Cl<sub>2</sub> 80:20) in 46% yield as a white powder: mp 110 °C; <sup>1</sup>H NMR (CDCl<sub>3</sub>) δ 3.84 (s, 3H), 6.33 (t, 2H, *J* = 2.1 Hz), 6.92-6.98 (m, 2H), 7.01 (t, 2H, *J* = 2.1 Hz), 7.30-7.34 (m, 2H); <sup>13</sup>C NMR (CDCl<sub>3</sub>) δ 55.7 (CH<sub>3</sub>), 110.0 (2CH), 114.7 (2CH), 119.8 (2CH), 122.3 (2CH), 134.6 (C), 157.7 (C).

***N*-(4-Bromophenyl)pyrrole (1e)** [4]. The procedure 1 (72 h reaction time) using pyrrole (0.42 mL) and 1-bromo-4-iodobenzene (1.1 g) gave **1e** (eluent: heptane-CH<sub>2</sub>Cl<sub>2</sub> 90:10) in 81% yield as a white powder: mp 92 °C; <sup>1</sup>H NMR (CDCl<sub>3</sub>) δ 6.41 (t, 2H, *J* = 2.3 Hz), 7.09 (t, 2H, *J* = 2.3 Hz), 7.26-7.32 (m, 2H), 7.53-7.59 (m, 2H); <sup>13</sup>C NMR (CDCl<sub>3</sub>) δ 111.0 (2CH), 118.7 (C), 119.2 (2CH), 121.9 (2CH), 132.6 (2CH), 139.7 (C).

***N*-(2-Thienyl)indole (2a)** [5]. The procedure 1 (48 h reaction time) using indole (0.70 g) and 2-iodothiophene (0.44 mL) gave **2a** (eluent: heptane-CH<sub>2</sub>Cl<sub>2</sub> 90:10) in 50% yield as a yellow oil: <sup>1</sup>H NMR (CDCl<sub>3</sub>) δ 6.92 (dd, 1H, *J* = 3.3 and 0.6 Hz), 7.20-7.33 (m, 3H), 7.44-7.56 (m, 3H), 7.87 (d, 1H, *J* = 8.1 Hz), 7.94 (dd, 1H *J* = 7.8 and 0.9 Hz); <sup>13</sup>C NMR (CDCl<sub>3</sub>) δ 104.2 (CH), 110.7 (CH), 120.3 (CH), 120.9 (CH), 121.1 (CH), 121.5 (CH), 122.9 (CH), 126.0 (CH), 129.0 (C), 129.3 (CH), 137.0 (C), 141.6 (C).

***N*-(3-Pyridyl)indole (2b)** [6]. The procedure 1 (48 h reaction time) using indole (0.70 g) and 3-iodopyridine (0.82 g) gave **2b** (eluent: heptane-AcOEt 80:20) in 70% yield as a yellow oil:

$^1\text{H}$  NMR ( $\text{CDCl}_3$ )  $\delta$  6.80 (dd, 1H,  $J = 3.3$  and  $0.9$  Hz), 7.24-7.35 (m, 2H), 7.36 (d, 1H,  $J = 3.3$  Hz), 7.48 (dd, 1H,  $J = 8.1$  and  $4.8$  Hz), 7.59 (d, 1H,  $J = 8.1$  Hz), 7.75-7.79 (m, 1H), 7.85 (ddd, 1H,  $J = 8.1$ ,  $2.7$  and  $1.5$  Hz), 8.65 (dd, 1H,  $J = 4.8$  and  $1.5$  Hz), 8.89 (d, 1H,  $J = 2.7$  Hz);  $^{13}\text{C}$  NMR ( $\text{CDCl}_3$ )  $\delta$  104.8 (CH), 109.9 (CH), 120.9 (CH), 121.4 (CH), 122.9 (CH), 124.1 (CH), 127.3 (CH), 129.4 (C), 131.4 (CH), 135.6 (C), 136.4 (C), 145.3 (CH), 147.2 (CH).

***N*-Phenylindole (2c)** [7]. The procedure 1 (24 h reaction time) using indole (0.70 g) and iodobenzene (0.82 g) gave **2c** (eluent: heptane- $\text{CH}_2\text{Cl}_2$  90:10) in 30% yield as a yellow oil:  $^1\text{H}$  NMR ( $\text{CDCl}_3$ )  $\delta$  6.73 (dd, 1H,  $J = 3.3$  and  $0.9$  Hz), 7.18-7.30 (m, 2H), 7.35-7.42 (m, 2H), 7.53-7.56 (m, 4H), 7.59-7.63 (m, 1H), 7.71-7.76 (m, 1H);  $^{13}\text{C}$  NMR ( $\text{CDCl}_3$ )  $\delta$  103.7 (CH), 110.6 (CH), 120.5 (CH), 121.2 (CH), 122.5 (CH), 124.5 (2CH), 126.6 (CH), 128.1 (CH), 129.4 (C), 129.7 (2CH), 135.9 (C), 139.9 (C).

***N*-(4-Methoxyphenyl)indole (2d)** [8]. The procedure 1 (72 h reaction time) using indole (0.70 g) and 4-iodoanisole (0.94 g) gave **2d** (eluent: heptane- $\text{CH}_2\text{Cl}_2$  90:10) in 15% yield as a white powder: mp  $58^\circ\text{C}$ ;  $^1\text{H}$  NMR ( $\text{CDCl}_3$ )  $\delta$  3.89 (s, 3H), 6.68 (dd, 1H,  $J = 3.3$  and  $0.9$  Hz), 7.02-7.08 (m, 2H), 7.15-7.26 (m, 2H), 7.30 (d, 1H,  $J = 3.0$  Hz), 7.40-7.46 (m, 2H), 7.46-7.51 (m, 1H), 7.69-7.73 (m, 1H);  $^{13}\text{C}$  NMR ( $\text{CDCl}_3$ )  $\delta$  55.7 ( $\text{CH}_3$ ), 103.0 (CH), 110.5 (CH), 114.8 (2CH), 120.2 (CH), 121.1 (CH), 122.3 (CH), 126.1 (2CH), 128.4 (CH), 129.1 (C), 133.0 (C), 136.4 (C), 158.4 (C).

***N*-(4-Bromophenyl)indole (2e)** [9]. The procedure 1 (56 h reaction time) using indole (0.70 g) and 1-bromo-4-iodobenzene (1.1 g) gave **2e** (eluent: heptane- $\text{CH}_2\text{Cl}_2$  90:10) in 60% yield as a yellow oil:  $^1\text{H}$  NMR ( $\text{CDCl}_3$ )  $\delta$  6.74 (dd, 1H,  $J = 3.3$  and  $0.9$  Hz), 7.20-7.31 (m, 2H), 7.32 (d, 1H,  $J = 3.3$  Hz), 7.38-7.43 (m, 2H), 7.54-7.59 (m, 1H), 7.63-7.69 (m, 2H), 7.72-7.76 (m, 1H);  $^{13}\text{C}$  NMR ( $\text{CDCl}_3$ )  $\delta$  104.3 (CH), 110.4 (CH), 119.8 (C), 120.7 (CH), 121.4 (CH), 122.8 (CH), 125.9 (2CH), 127.7 (CH), 129.5 (C), 132.8 (2CH), 135.8 (C), 138.9 (C). *Crystal data for 2e.*  $\text{C}_{14}\text{H}_{10}\text{BrN}$ ,  $M = 272.14$ , monoclinic,  $P2_1/n$ ,  $a = 9.7442(7)$ ,  $b = 13.1654(12)$ ,  $c = 17.8252(17)$  Å,  $\beta = 93.934(4)^\circ$ ,  $V = 2281.3(3)$  Å<sup>3</sup>,  $Z = 8$ ,  $d = 1.585$  g cm<sup>-3</sup>,  $\mu = 3.572$  mm<sup>-1</sup>. A final refinement on  $F^2$  with 5231 unique intensities and 289 parameters converged at  $\omega R(F^2) = 0.2092$  ( $R(F) = 0.0822$ ) for 3568 observed reflections with  $I > 2\sigma(I)$ .

***N*-(4-(Trifluoromethyl)phenyl)pyrrole (1f)** [10]. The procedure 2 (24 h reaction time) using pyrrole (0.69 mL) and 1-iodo-4-(trifluoromethyl)benzene (1.8 mL) gave **1f** (eluent: heptane-

AcOEt 90:10) in 96% yield as a white powder: mp 112 °C;  $^1\text{H}$  NMR ( $\text{CDCl}_3$ )  $\delta$  6.40 (t, 2H,  $J = 2.1$  Hz), 7.14 (t, 2H,  $J = 2.1$  Hz), 7.50 (d, 2H,  $J = 8.1$  Hz), 7.69 (d, 2H,  $J = 8.4$  Hz);  $^{13}\text{C}$  NMR ( $\text{CDCl}_3$ )  $\delta$  111.6 (2CH), 119.2 (2CH), 120.0 (2CH), 124.2 (q, C,  $J = 270$  Hz), 127.0 (q, 2CH,  $J = 3.8$  Hz), 127.5 (q, C,  $J = 33$  Hz), 143.3 (C).

***N*-(4-(Trifluoromethyl)phenyl)indole (2f)** [11]. The procedure 2 (24 h reaction time) using indole (1.2 g) and 1-iodo-4-(trifluoromethyl)benzene (1.8 mL) gave **2f** (eluent: heptane- $\text{CH}_2\text{Cl}_2$  70:30) in 90% yield as a white powder: mp 62 °C;  $^1\text{H}$  NMR ( $\text{CDCl}_3$ )  $\delta$  6.76 (dd, 1H,  $J = 3.3$  and 0.9 Hz), 7.21-7.33 (m, 2H), 7.38 (d, 1H,  $J = 3.3$  Hz), 7.61-7.68 (m, 3H), 7.73 (dm, 1H,  $J = 7.5$  Hz), 7.81 (d, 1H,  $J = 8.4$  Hz);  $^{13}\text{C}$  NMR ( $\text{CDCl}_3$ )  $\delta$  105.0 (CH), 110.5 (CH), 121.1 (CH), 121.6 (CH), 123.1 (CH), 124.0 (2CH), 124.1 (q, C,  $J = 271$  Hz), 127.0 (q, 2CH,  $J = 3.7$  Hz), 127.5 (CH), 128.3 (q, C,  $J = 32$  Hz), 129.8 (C), 135.6 (C), 142.9 (C).

***N*-(5-iodo-2-thienyl)pyrrole (3a)**. The procedure 3 using *N*-(2-thienyl)pyrrole (**1a**, 0.15 g) gave **3a** (eluent: heptane-AcOEt 80:20) in 97% yield as a beige powder: mp < 50 °C; IR (ATR): 678, 722, 747, 769, 784, 810, 881, 937, 995, 1018, 1047, 1066, 1109, 1213, 1228, 1252, 1267, 1283, 1310, 1480, 1511, 1558, 1723, 2964  $\text{cm}^{-1}$ ;  $^1\text{H}$  NMR ( $\text{CDCl}_3$ )  $\delta$  6.37 (t, 2H,  $J = 2.1$  Hz), 6.62 (d, 1H,  $J = 3.9$  Hz), 6.97 (t, 2H,  $J = 2.1$  Hz), 7.14 (d, 1H,  $J = 3.9$  Hz);  $^{13}\text{C}$  NMR ( $\text{CDCl}_3$ )  $\delta$  66.2 (C), 110.9 (2CH), 117.0 (CH), 121.0 (2CH), 135.9 (CH), 148.5 (C); MS (ESI): calcd for  $\text{C}_8\text{H}_6\text{INS}$   $[\text{M}]^+$  275, found 275.

***N*-(5-Iodo-2-thienyl)indole (4a)**. The procedure 3 using *N*-(2-thienyl)indole (**2a**, 0.20 g) gave **4a** (eluent: heptane-AcOEt 80:20) in 91% yield as a yellow oil; IR (ATR): 717, 739, 761, 793, 891, 944, 1014, 1131, 1196, 1213, 1226, 1285, 1306, 1331, 1457, 1475, 1516, 1550, 3051  $\text{cm}^{-1}$ ;  $^1\text{H}$  NMR ( $\text{CDCl}_3$ )  $\delta$  6.79 (dd, 1H,  $J = 3.3$  and 0.9 Hz), 6.83 (d, 1H,  $J = 3.9$  Hz), 7.30-7.44 (m, 4H), 7.70 (dm, 1H,  $J = 8.4$  Hz), 7.80 (dm, 1H,  $J = 8.0$  Hz);  $^{13}\text{C}$  NMR ( $\text{CDCl}_3$ )  $\delta$  68.9 (C), 104.8 (CH), 110.6 (CH), 121.2 (CH), 121.2 (CH), 121.9 (CH), 123.2 (CH), 128.8 (CH), 129.1 (C), 135.8 (CH), 136.8 (C), 146.2 (C); MS (ESI): calcd for  $\text{C}_{12}\text{H}_8\text{INS}$   $[\text{M}]^+$  325, found 325.

***N*-(2-Iodo-3-pyridyl)pyrrole (3b)**. The procedure 4 using *N*-(3-pyridyl)pyrrole (**1b**, 72 mg) gave **3b** (eluent: heptane-AcOEt 50:50) in 59% yield as a beige powder: mp 104-106 °C; IR (ATR): 705, 733, 815, 923, 1010, 1047, 1068, 1083, 1109, 1209, 1237, 1332, 1383, 1397, 1461, 1491, 1556, 3125  $\text{cm}^{-1}$ ;  $^1\text{H}$  NMR ( $\text{CDCl}_3$ )  $\delta$  6.34 (t, 2H,  $J = 2.2$  Hz), 6.80 (t, 2H,  $J = 2.2$  Hz), 7.33 (dd, 1H,  $J = 7.8$  and 4.5 Hz), 7.50 (dd, 1H,  $J = 7.8$  and 1.8 Hz), 8.37 (dd, 1H,  $J =$

4.5 and 1.8 Hz);  $^{13}\text{C}$  NMR ( $\text{CDCl}_3$ )  $\delta$  110.1 (2CH), 119.9 (C), 122.1 (2CH), 123.1 (CH), 134.7 (CH), 141.8 (C), 149.5 (CH); MS (ESI): calcd for  $\text{C}_9\text{H}_7\text{IN}_2$   $[\text{M}]^+$  270, found 270.

***N*-(2-Iodo-3-pyridyl)indole (4b)**. The procedure 4 using *N*-(3-pyridyl)indole (**2b**, 0.19 g) gave **4b** (eluent: heptane-AcOEt 80:20) in 71% yield as a yellow oil; IR (ATR): 678, 709, 726, 744, 768, 811, 884, 1017, 1046, 1140, 1187, 1213, 1227, 1250, 1267, 1288, 1308, 1332, 1399, 1438, 1460, 1510, 1566, 2965, 3050  $\text{cm}^{-1}$ ;  $^1\text{H}$  NMR ( $\text{CDCl}_3$ )  $\delta$  6.75 (dd, 1H,  $J = 3.3$  and 0.9 Hz), 7.01-7.24 (m, 4H), 7.42 (dd, 1H,  $J = 7.8$  and 4.5 Hz), 7.63 (dd, 1H,  $J = 7.8$  and 1.8 Hz), 7.70-7.74 (m, 1H), 8.49 (dd, 1H,  $J = 4.5$  and 1.8 Hz);  $^{13}\text{C}$  NMR ( $\text{CDCl}_3$ )  $\delta$  104.3 (CH), 110.4 (CH), 120.8 (CH), 121.3 (CH), 121.9 (C), 122.8 (CH), 123.4 (CH), 128.4 (CH), 128.7 (C), 136.4 (CH), 136.8 (C), 140.2 (C), 150.2 (CH); MS (ESI): calcd for  $\text{C}_{13}\text{H}_9\text{IN}_2$   $[\text{M}]^+$  320, found 320.

**2-Iodo-*N*-(3-iodo-4-methoxyphenyl)indole (4d')**. The procedure 4 using *N*-(4-methoxyphenyl)-1*H*-indole (**2d**, 0.11 g) gave **4d'** (eluent: heptane-AcOEt 80:20) in 15% yield as a beige powder: mp 166 °C; IR (ATR): 681, 731, 745, 782, 817, 906, 1018, 1046, 1147, 1212, 1248, 1265, 1286, 1309, 1440, 1464, 1490, 1564, 1595, 2838, 2939, 3061  $\text{cm}^{-1}$ ;  $^1\text{H}$  NMR ( $\text{CDCl}_3$ )  $\delta$  3.98 (s, 3H), 6.93 (d, 1H,  $J = 0.6$  Hz), 6.95 (d, 1H,  $J = 8.7$  Hz), 7.08-7.13 (m, 3H), 7.32 (dd, 1H,  $J = 8.7$  and 2.4 Hz), 7.56-7.59 (m, 1H), 7.78 (d, 1H,  $J = 2.7$  Hz);  $^{13}\text{C}$  NMR ( $\text{CDCl}_3$ )  $\delta$  56.8 ( $\text{CH}_3$ ), 84.5 (C), 85.6 (C), 110.6 (CH), 110.8 (CH), 113.7 (CH), 119.5 (CH), 120.6 (CH), 122.6 (CH), 129.7 (C), 130.2 (CH), 132.7 (C), 139.6 (C), 139.8 (CH), 158.4 (C); MS (ESI): calcd for  $\text{C}_{15}\text{H}_{11}\text{I}_2\text{NO}$   $[\text{M}]^+$  475, found 475.

***N*-(4-Bromo-3-iodophenyl)pyrrole (3e)**. The procedure 4 using *N*-(4-bromophenyl)pyrrole (**1e**, 0.11 g) gave **3e** (eluent: heptane-AcOEt 80:20) in 58% yield as a yellow powder: mp 64-66 °C; IR (ATR): 656, 723, 812, 867, 928, 1007, 1021, 1067, 1123, 1264, 1328, 1397, 1456, 1488, 1525, 1560, 1580, 2927, 3103  $\text{cm}^{-1}$ ;  $^1\text{H}$  NMR ( $\text{CDCl}_3$ )  $\delta$  6.38 (t, 2H,  $J = 2.2$  Hz), 7.03 (t, 2H,  $J = 2.1$  Hz), 7.23 (dd, 1H,  $J = 8.7$  and 2.7 Hz), 7.62 (d, 1H,  $J = 8.7$  Hz), 7.89 (d, 1H,  $J = 2.7$  Hz);  $^{13}\text{C}$  NMR ( $\text{CDCl}_3$ )  $\delta$  101.9 (C), 111.4 (2CH), 119.2 (2CH), 121.3 (CH), 126.1 (C), 131.7 (CH), 133.1 (CH), 140.2 (C). *Crystal data for 3e*.  $\text{C}_{10}\text{H}_7\text{BrIN}$ ,  $M = 347.98$ , monoclinic,  $P2_1/n$ ,  $a = 10.0665(5)$ ,  $b = 5.9895(4)$ ,  $c = 17.5155(10)$  Å,  $\beta = 103.942(3)$  °,  $V = 1024.96(10)$  Å<sup>3</sup>,  $Z = 4$ ,  $d = 2.255$  g  $\text{cm}^{-3}$ ,  $\mu = 6.974$  mm<sup>-1</sup>. A final refinement on  $F^2$  with 2335 unique intensities and 118 parameters converged at  $\omega R(F^2) = 0.0789$  ( $R(F) = 0.032$ ) for 1971 observed reflections with  $I > 2\sigma(I)$ .

***N*-(4-Bromo-3-iodophenyl)indole (4e).** The procedure 4 using *N*-(4-bromophenyl)indole (**2e**, 0.14 g) gave **4e** (eluent: heptane-AcOEt 80:20) in 57% yield as a yellow oil: IR (ATR): 694, 738, 761, 820, 883, 907, 963, 1009, 1072, 1100, 1133, 1211, 1232, 1298, 1333, 1465, 1490, 1516, 1579, 1709, 1895, 2929, 3051  $\text{cm}^{-1}$ ;  $^1\text{H}$  NMR ( $\text{CDCl}_3$ )  $\delta$  6.70 (dd, 1H,  $J = 3.3$  and 0.6 Hz), 7.16-7.29 (m, 2H), 7.27 (d, 1H,  $J = 3.3$  Hz), 7.38 (dd, 1H,  $J = 8.4$  and 2.4 Hz), 7.52 (dd, 1H,  $J = 8.4$  and 0.9 Hz), 7.68 (dd, 1H,  $J = 7.2$  and 1.8 Hz), 7.74 (d, 1H,  $J = 8.7$  Hz), 8.02 (d, 1H,  $J = 2.4$  Hz);  $^{13}\text{C}$  NMR ( $\text{CDCl}_3$ )  $\delta$  101.9 (C), 104.7 (CH), 110.2 (CH), 120.9 (CH), 121.4 (CH), 122.9 (CH), 125.0 (CH), 127.0 (C), 127.3 (CH), 129.5 (C), 133.2 (CH), 135.3 (CH), 135.4 (C), 139.3 (C); MS (ESI): calcd for  $\text{C}_{14}\text{H}_9\text{BrIN}$   $[\text{M}]^+$  397, found 397.

**2-Iodo-*N*-phenylpyrrole (3c).** The procedure 5 using commercial *N*-phenylpyrrole (**1c**, 95 mg) gave **3c** (eluent: heptane-AcOEt 80:20) in 86% yield as a yellow oil; IR (ATR): 692, 710, 761, 782, 875, 940, 1033, 1072, 1116, 1299, 1320, 1388, 1431, 1457, 1496, 1513, 1597, 2925, 3047, 3103  $\text{cm}^{-1}$ ;  $^1\text{H}$  NMR ( $\text{CDCl}_3$ )  $\delta$  6.19 (dd, 1H,  $J = 3.6$  and 3.0 Hz), 6.41 (dd, 1H,  $J = 3.6$  and 1.8 Hz), 6.87 (dd, 1H,  $J = 3.0$  and 1.8 Hz), 7.19-7.32 (m, 5H);  $^{13}\text{C}$  NMR ( $\text{CDCl}_3$ )  $\delta$  69.1 (C), 111.8 (CH), 120.4 (CH), 125.7 (CH), 126.8 (2CH), 127.8 (CH), 128.8 (2CH), 140.8 (C). The analyses are similar to those previously reported [12].

**2-Iodo-*N*-phenylindole (4c).** The procedure 5 using *N*-phenylindole (**2c**, 0.13 g) gave **4c** (eluent: heptane-AcOEt 80:20), after recrystallization from pentane, in 92% yield as a yellow powder: mp 88  $^\circ\text{C}$ ; IR (ATR): 678, 691, 746, 763, 780, 809, 962, 1016, 1046, 1070, 1139, 1212, 1227, 1251, 1267, 1289, 1307, 1436, 1457, 1494, 1594, 2924, 3043  $\text{cm}^{-1}$ ;  $^1\text{H}$  NMR ( $\text{CDCl}_3$ )  $\delta$  6.99 (s, 1H), 7.11-7.18 (m, 3H), 7.37-7.42 (m, 2H), 7.53-7.64 (m, 4H);  $^{13}\text{C}$  NMR ( $\text{CDCl}_3$ )  $\delta$  83.9 (C), 110.9 (CH), 113.8 (CH), 119.5 (CH), 120.5 (CH), 122.4 (CH), 128.7 (CH), 129.1 (2CH), 129.4 (2CH), 129.7 (C), 138.8 (C), 139.5 (C). *Crystal data for 4c.*  $\text{C}_{14}\text{H}_{10}\text{IN}$ ,  $M = 319.13$ , monoclinic,  $Cc$ ,  $a = 7.0800(3)$ ,  $b = 20.6660(10)$ ,  $c = 8.2442(5)$   $\text{\AA}$ ,  $\beta = 100.632(2)^\circ$ ,  $V = 1185.54(10)$   $\text{\AA}^3$ ,  $Z = 4$ ,  $d = 1.788$   $\text{g cm}^{-3}$ ,  $\mu = 2.671$   $\text{mm}^{-1}$ . A final refinement on  $F^2$  with 2183 unique intensities and 145 parameters converged at  $\omega R(F^2) = 0.0563$  ( $R(F) = 0.0233$ ) for 2139 observed reflections with  $I > 2\sigma(I)$ .

***N*-(3-Iodo-4-methoxyphenyl)pyrrole (3d).** The procedure 6 using *N*-(4-methoxyphenyl)pyrrole (**1d**, 0.12 g) gave **3d** (eluent: heptane-AcOEt 80:20) in 97% yield as a white powder: mp 126-128  $^\circ\text{C}$ ; IR (ATR): 670, 739, 808, 885, 932, 1011, 1024, 1047, 1070, 1125, 1181, 1242, 1259, 1294, 1332, 1413, 1440, 1456, 1499, 1575, 1600, 2835, 2958, 3128

cm<sup>-1</sup>; <sup>1</sup>H NMR (CDCl<sub>3</sub>) δ 3.90 (s, 3H), 6.35 (t, 2H, *J* = 2.3 Hz), 6.85 (d, 1H, *J* = 8.7 Hz), 6.99 (t, 2H, *J* = 2.3 Hz), 7.34 (dd, 1H, *J* = 8.7 and 2.4 Hz), 7.83 (d, 1H, *J* = 2.7 Hz); <sup>13</sup>C NMR (CDCl<sub>3</sub>) δ 56.7 (CH<sub>3</sub>), 86.2 (C), 110.4 (2CH), 111.1 (CH), 119.6 (2CH), 121.9 (CH), 132.0 (CH), 135.4 (C), 156.3 (C). *Crystal data for 3d*. C<sub>11</sub>H<sub>10</sub>INO, *M* = 299.10, monoclinic, *P* 2<sub>1</sub>/*n*, *a* = 9.9461(4), *b* = 6.9825(3), *c* = 15.2049(8) Å, β = 92.314(2) °, *V* = 1055.10(8) Å<sup>3</sup>, *Z* = 4, *d* = 1.883 g cm<sup>-3</sup>, μ = 3.001 mm<sup>-1</sup>. A final refinement on *F*<sup>2</sup> with 2409 unique intensities and 128 parameters converged at ω*R*(*F*<sup>2</sup>) = 0.0548 (*R*(*F*) = 0.0253) for 2149 observed reflections with *I* > 2σ(*I*).

***N*-(3-Iodo-4-methoxyphenyl)indole (4d)**. The procedure 6 using *N*-(4-methoxyphenyl)indole (**2d**, 0.15 g) gave **4d** (eluent: heptane-AcOEt 80:20), after recrystallization from pentane, in 71% yield as a beige powder: mp 98-100 °C; IR (ATR): 678, 726, 747, 768, 810, 885, 968, 1017, 1046, 1112, 1139, 1186, 1215, 1227, 1250, 1267, 1287, 1334, 1459, 1492, 1510, 1597, 2965 cm<sup>-1</sup>; <sup>1</sup>H NMR (CDCl<sub>3</sub>) δ 3.96 (s, 3H), 6.68 (dd, 1H, *J* = 3.3 and 0.9 Hz), 6.94 (d, 1H, *J* = 8.7 Hz), 7.16-7.27 (m, 2H), 7.26 (d, 1H, *J* = 2.7 Hz), 7.44-7.48 (m, 2H), 7.68-7.72 (m, 1H), 7.93 (d, 1H, *J* = 2.7 Hz); <sup>13</sup>C NMR (CDCl<sub>3</sub>) δ 56.8 (CH<sub>3</sub>), 86.2 (C), 103.5 (CH), 110.3 (CH), 111.1 (CH), 120.5 (CH), 121.2 (CH), 122.5 (CH), 125.8 (CH), 128.1 (CH), 129.1 (C), 134.0 (C), 135.8 (CH), 136.3 (C), 157.0 (C); MS (ESI): calcd for C<sub>15</sub>H<sub>12</sub>INO [M]<sup>+</sup> 349, found 349.

***N*-(3-(1-Pyrrolyl)-2-pyridyl)imidazole (5b)**. The procedure 7 using *N*-(2-iodo-3-pyridyl)pyrrole (**3b**, 0.27 g) gave **5b** (eluent: AcOEt-heptane 80:20) in 85% yield as a yellow oil: IR (ATR): 655, 728, 765, 810, 923, 972, 1013, 1048, 1072, 1093, 1213, 1239, 1260, 1302, 1335, 1446, 1493, 1582, 3119 cm<sup>-1</sup>; <sup>1</sup>H NMR (CDCl<sub>3</sub>) δ 6.31 (t, 2H, *J* = 2.1 Hz), 6.61 (t, 2H, *J* = 2.1 Hz), 6.82 (s, 1H), 6.97 (s, 1H), 7.34 (dd, 1H, *J* = 7.8 and 4.8 Hz), 7.41 (s, 1H), 7.77 (dd, 1H, *J* = 8.1 and 1.7 Hz), 8.47 (dd, 1H, *J* = 4.8 and 1.7 Hz); <sup>13</sup>C NMR (CDCl<sub>3</sub>) δ 111.4 (2CH), 117.5 (CH), 121.1 (2CH), 122.7 (CH), 128.3 (C), 129.6 (CH), 136.1 (CH), 137.3 (CH), 144.8 (C), 147.9 (CH); MS (ESI): calcd for C<sub>12</sub>H<sub>10</sub>N<sub>4</sub> [M]<sup>+</sup> 210, found 210.

***N*-(2-Methoxy-5-(1-pyrrolyl)phenyl)imidazole (5d)**. The procedure 7 using *N*-(3-iodo-4-methoxyphenyl)pyrrole (**3d**, 0.30 g) gave **5d** (eluent: AcOEt-heptane 80:20) in 67% yield as a beige powder: mp 130 °C; IR (ATR): 659, 700, 723, 813, 985, 1019, 1032, 1055, 1070, 1247, 1263, 1281, 1464, 1496, 1520, 2841, 2937, 3109 cm<sup>-1</sup>; <sup>1</sup>H NMR (CDCl<sub>3</sub>) δ 3.87 (s, 3H), 6.34 (t, 2H, *J* = 2.1 Hz), 7.01 (t, 2H, *J* = 2.1 Hz), 7.10 (d, 1H, *J* = 8.7 Hz), 7.19 (s, 1H), 7.23 (s, 1H), 7.32 (d, 1H, *J* = 2.7 Hz), 7.37 (dd, 1H, *J* = 8.7 and 2.7 Hz), 7.84 (s, 1H); <sup>13</sup>C NMR



(CDCl<sub>3</sub>)  $\delta$  56.3 (CH<sub>3</sub>), 110.7 (2CH), 113.3 (CH), 118.3 (CH), 119.6 (2CH), 120.2 (CH), 120.9 (CH), 127.0 (C), 129.0 (CH), 134.7 (C), 137.8 (CH), 150.4 (C). *Crystal data for 5d*. C<sub>14</sub>H<sub>13</sub>N<sub>3</sub>O, *M* = 239.27, monoclinic, *P* 2<sub>1</sub>/*n*, *a* = 11.4222(6), *b* = 5.4888(3), *c* = 19.7338(12) Å,  $\beta$  = 100.562(2) °, *V* = 1216.23(12) Å<sup>3</sup>, *Z* = 4, *d* = 1.307 g cm<sup>-3</sup>,  $\mu$  = 0.086 mm<sup>-1</sup>. A final refinement on *F*<sup>2</sup> with 2777 unique intensities and 164 parameters converged at  $\omega R(F^2)$  = 0.101 (*R*(*F*) = 0.0404) for 2281 observed reflections with *I* > 2 $\sigma$ (*I*).

***N*-(2-Methoxy-5-(1-indolyl)phenyl)imidazole (6d)**. The procedure 7 using *N*-(3-iodo-4-methoxyphenyl)indole (**4d**, 0.35 g) gave **6d** (eluent: AcOEt-heptane 80:20) in 40% yield as a yellow oil: IR (ATR): 659, 704, 737, 762, 817, 884, 1022, 1055, 1093, 1106, 1134, 1212, 1226, 1251, 1286, 1457, 1491, 1519, 1591, 1609, 2841, 2932, 3051 cm<sup>-1</sup>; <sup>1</sup>H NMR (CDCl<sub>3</sub>)  $\delta$  3.93 (s, 3H), 6.69 (d, 1H, *J* = 2.7 Hz), 7.17-7.30 (m, 6H), 7.44-7.51 (m, 3H), 7.69 (d, 1H, *J* = 7.2 Hz), 7.84 (br s, 1H); <sup>13</sup>C NMR (CDCl<sub>3</sub>)  $\delta$  56.4 (CH<sub>3</sub>), 103.9 (CH), 110.1 (CH), 113.3 (CH), 120.2 (CH), 120.6 (CH), 121.4 (CH), 121.8 (CH), 122.7 (CH), 124.9 (CH), 128.0 (CH), 128.0 (C), 129.0 (CH), 129.2 (C), 133.3 (C), 136.1 (C), 137.8 (CH), 151.1 (C); MS (ESI): calcd for C<sub>18</sub>H<sub>15</sub>N<sub>3</sub>O [*M*]<sup>+</sup> 289, found 289.

1. Reddy, V. P.; Kumar, A. V.; Rao, K. R. *Tetrahedron Lett.* **2011**, *52*, 777-780. doi:10.1016/j.tetlet.2010.12.016
2. Teo, Y.-C.; Yong, F.-F.; Sim, S. *Tetrahedron* **2013**, *69*, 7279-7284. doi:10.1016/j.tet.2013.06.095
3. Panda, N.; Jena, A. K.; Mohapatra, S.; Rout, S. R. *Tetrahedron Lett.* **2011**, *52*, 1924-1927. doi:10.1016/j.tetlet.2011.02.050
4. Jiang, D.; Fu, H.; Jiang, Y.; Zhao, Y. *J. Org. Chem.* **2007**, *72*, 672-674. doi:10.1021/jo062060e
5. Tang, B.-X.; Guo, S.-M.; Zhang, M.-B.; Li, J.-H. *Synthesis* **2008**, 1707-1716. doi:10.1055/s-2008-1067014
6. Romero, M.; Harrak, Y.; Basset, J.; Ginet, L.; Constans, P.; Pujol, M. D. *Tetrahedron* **2006**, *62*, 9010-9016. doi:10.1016/j.tet.2006.07.011
7. Kidwai, M.; Mishra, N. K.; Bhardwaj, S.; Jahan, A.; Kumar, A.; Mozumdar, S. *ChemCatChem* **2010**, *2*, 1312-1317. doi:10.1002/cctc.201000062
8. Rao, R. K.; Naidu, A. B.; Jaseer, E. A.; Sekar, G. *Tetrahedron* **2009**, *65*, 4619-4624. doi:10.1016/j.tet.2009.03.061
9. Rao, H.; Jin, Y.; Fu, H.; Jiang, Y.; Zhao, Y. *Chem. Eur. J.* **2006**, *12*, 3636-3646. doi:10.1002/chem.200501473
10. Ma, H.-C.; Jiang, X.-Z. *J. Org. Chem.* **2007**, *72*, 8943-8946. doi:10.1021/jo7015983
11. Bellina, F.; Calandri, C.; Cauteruccio, S.; Rossi, R. *Eur. J. Org. Chem.* **2007**, 2147-2151. doi:10.1002/ejoc.200601084
12. Seggio, A.; Lannou, M. I.; Chevallier, F.; Nobuto, D.; Uchiyama, M.; Golhen, S.; Roisnel, T.; Mongin, F. *Chem. Eur. J.* **2007**, *13*, 9982-9989. doi:10.1002/chem.200700608

# Compound 3a

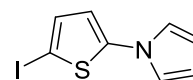

$^1\text{H}$  NMR (300 MHz,  $\text{CDCl}_3$ )

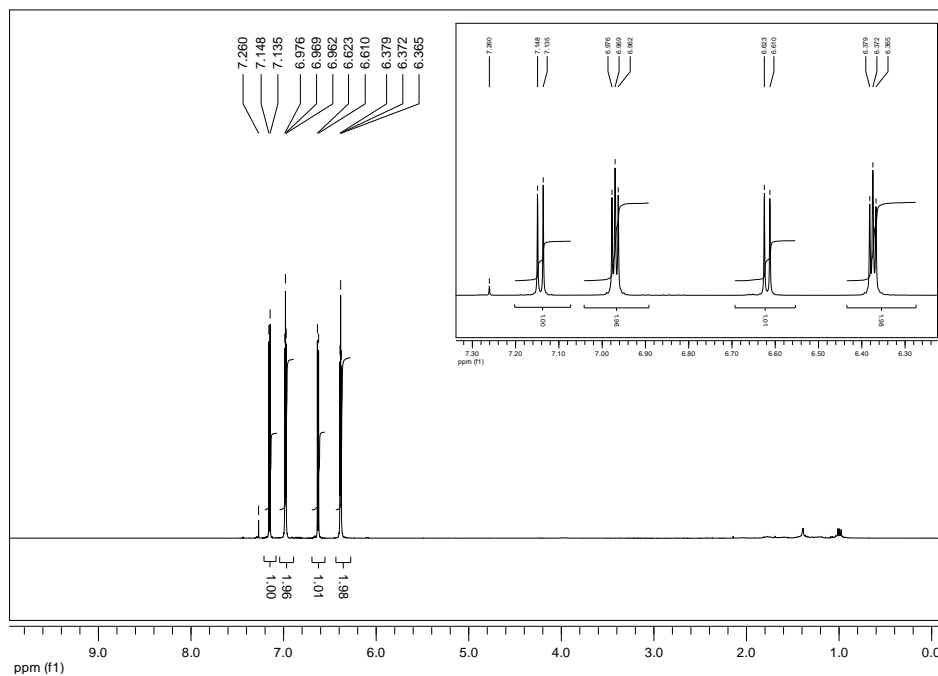

$^{13}\text{C}$  NMR (75 MHz,  $\text{CDCl}_3$ )

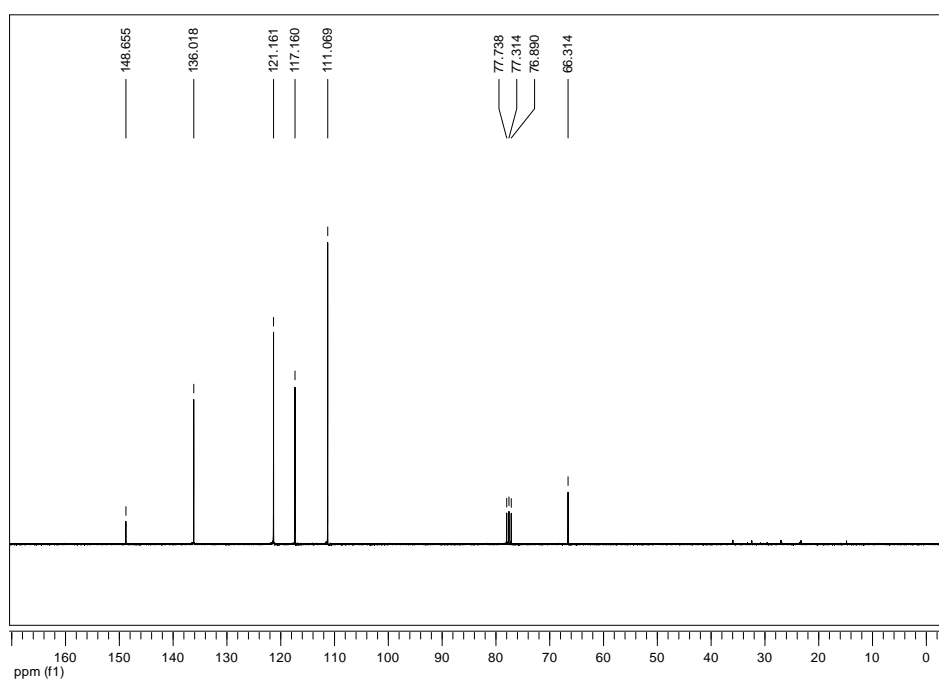

### Compound 4a

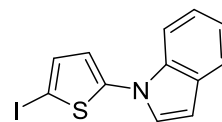

$^1\text{H}$  NMR (300 MHz,  $\text{CDCl}_3$ )

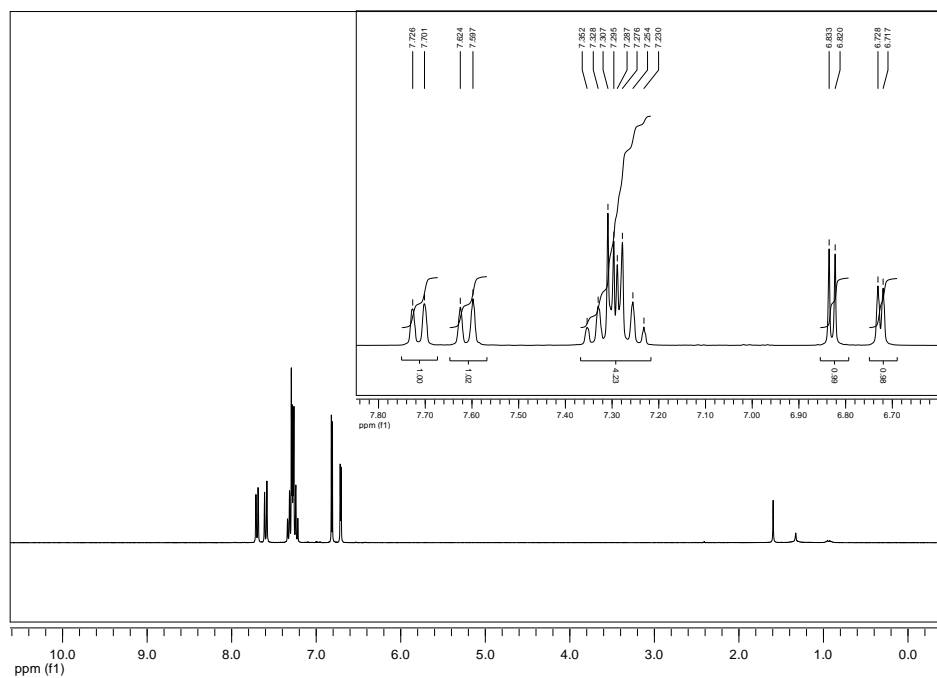

$^{13}\text{C}$  NMR (75 MHz,  $\text{CDCl}_3$ )

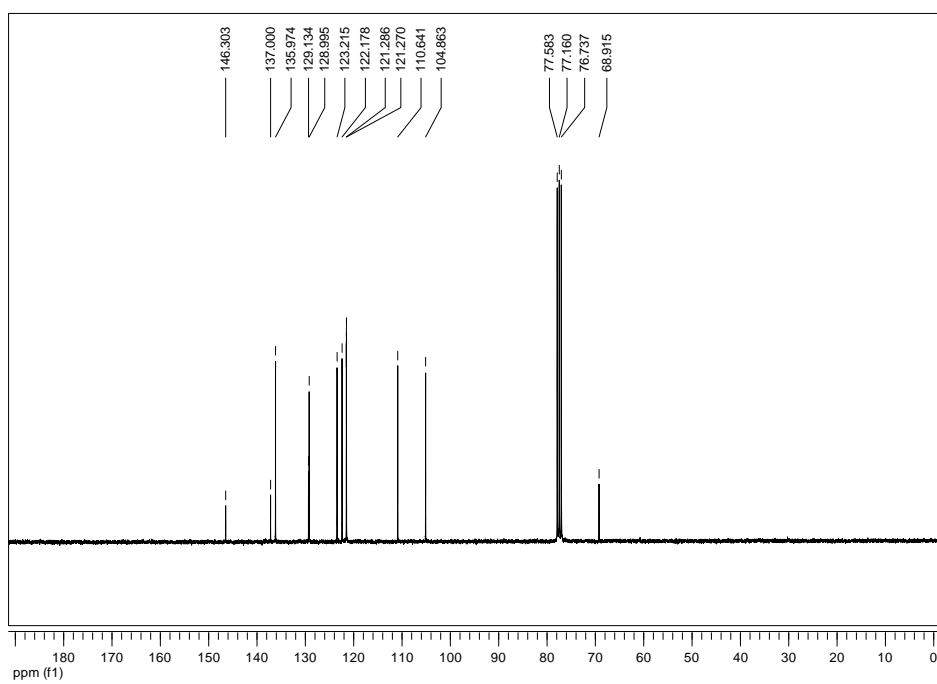

### Compound 3b

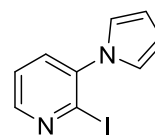

$^1\text{H}$  NMR (300 MHz,  $\text{CDCl}_3$ )

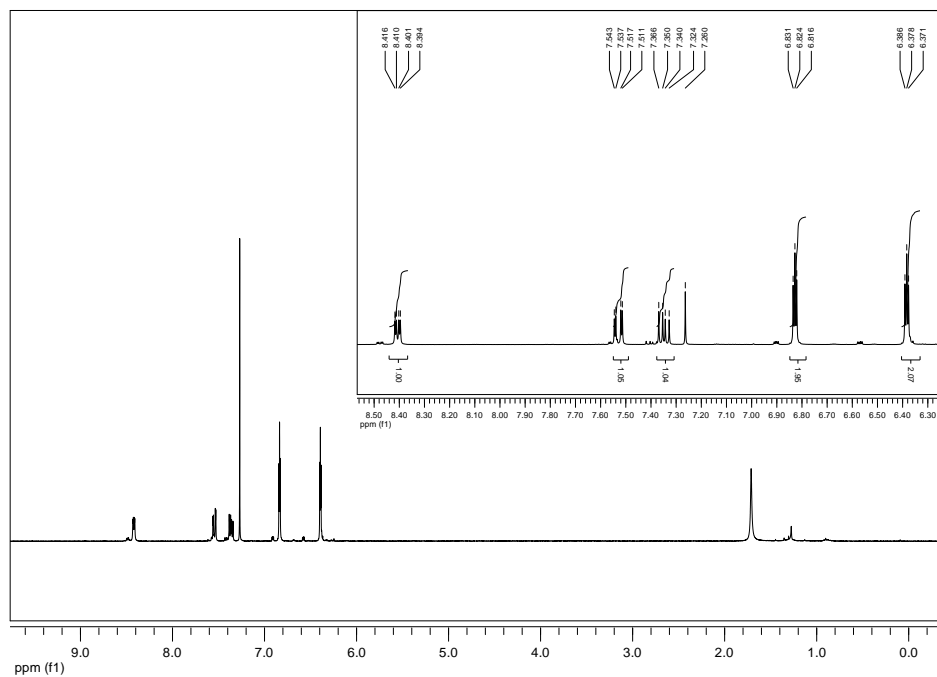

$^{13}\text{C}$  NMR (75 MHz,  $\text{CDCl}_3$ )

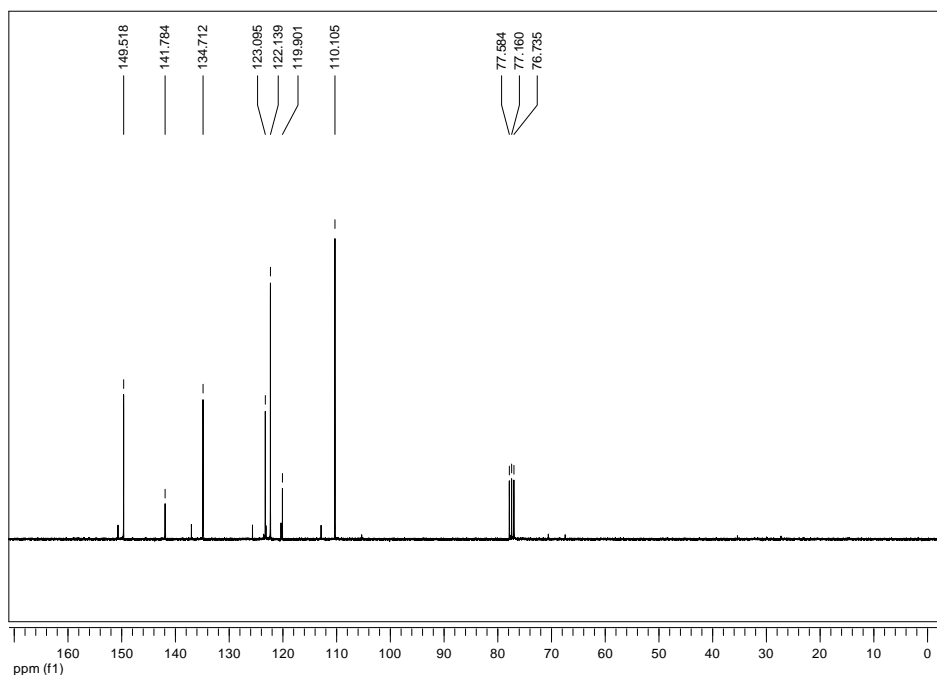

### Compound 4d'

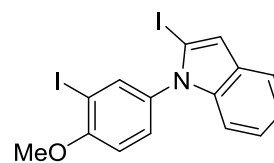

$^1\text{H}$  NMR (300 MHz,  $\text{CDCl}_3$ )

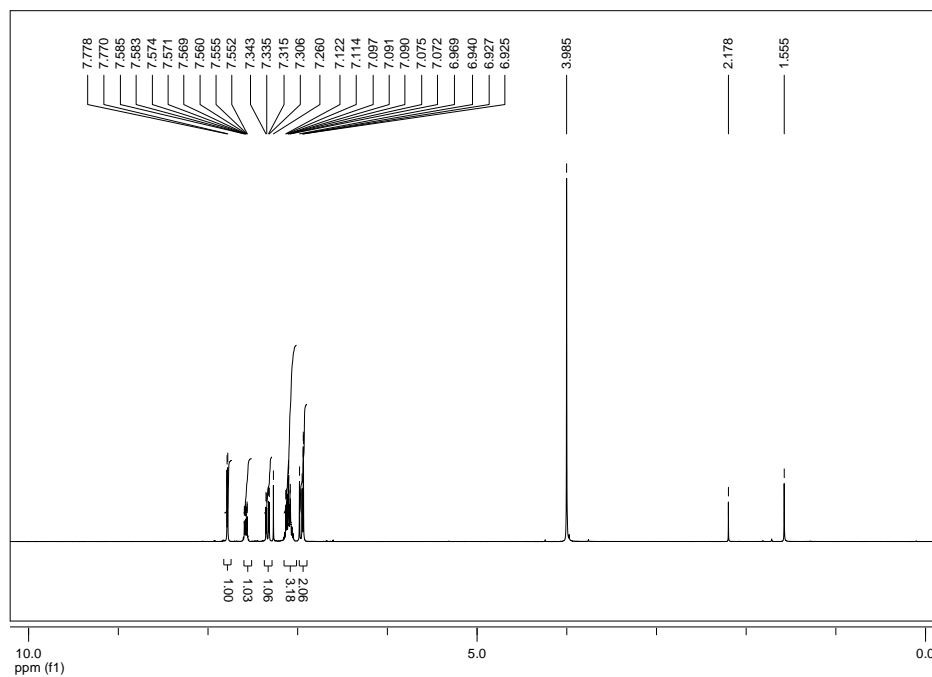

$^{13}\text{C}$  NMR (75 MHz,  $\text{CDCl}_3$ )

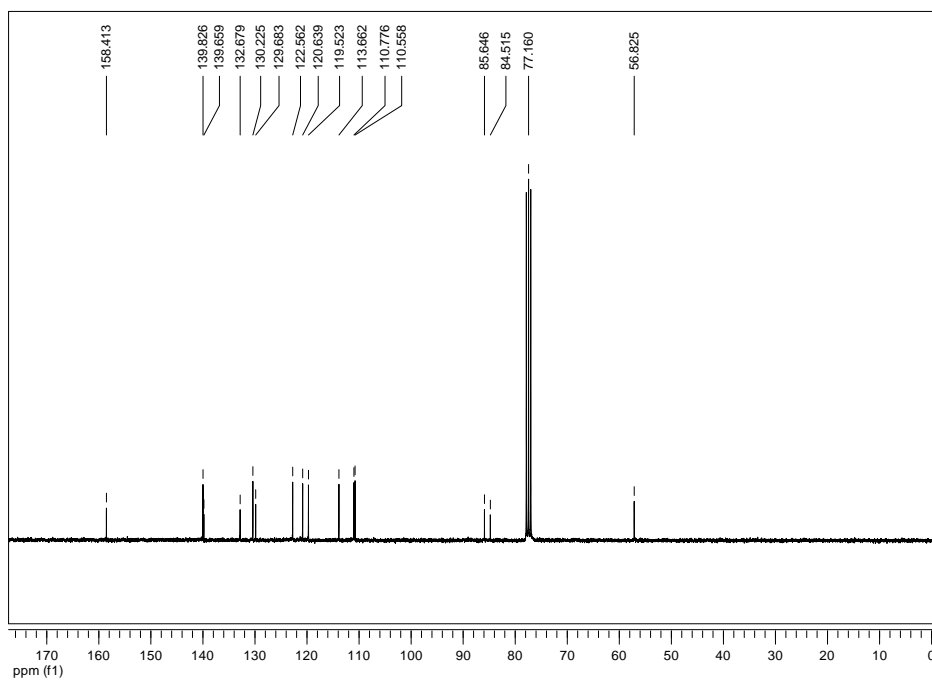

### Compound 3e

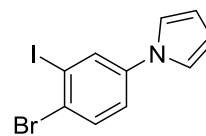

$^1\text{H}$  NMR (300 MHz,  $\text{CDCl}_3$ )

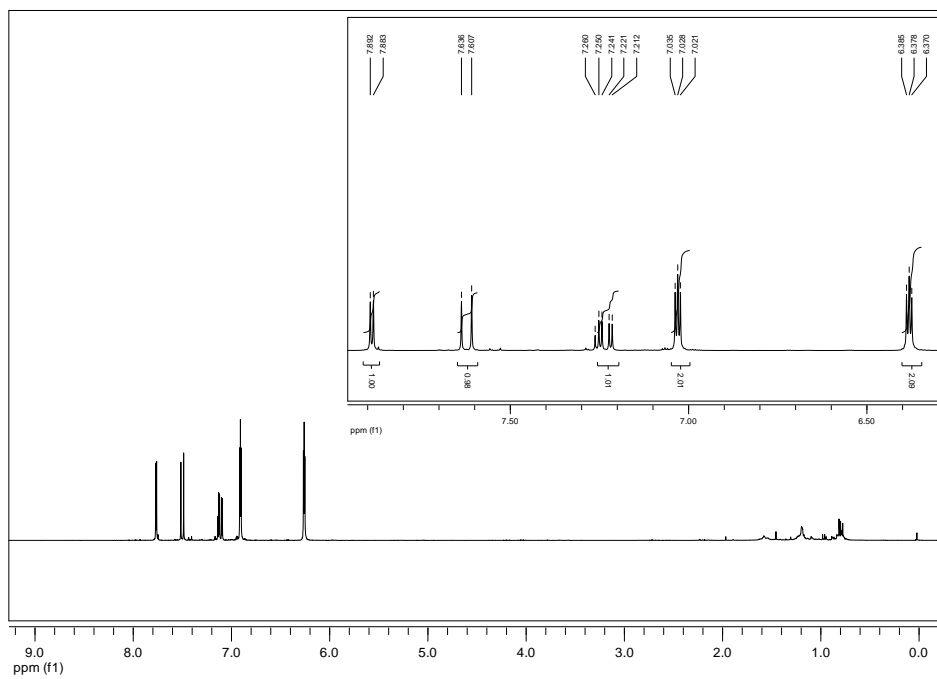

$^{13}\text{C}$  NMR (75 MHz,  $\text{CDCl}_3$ )

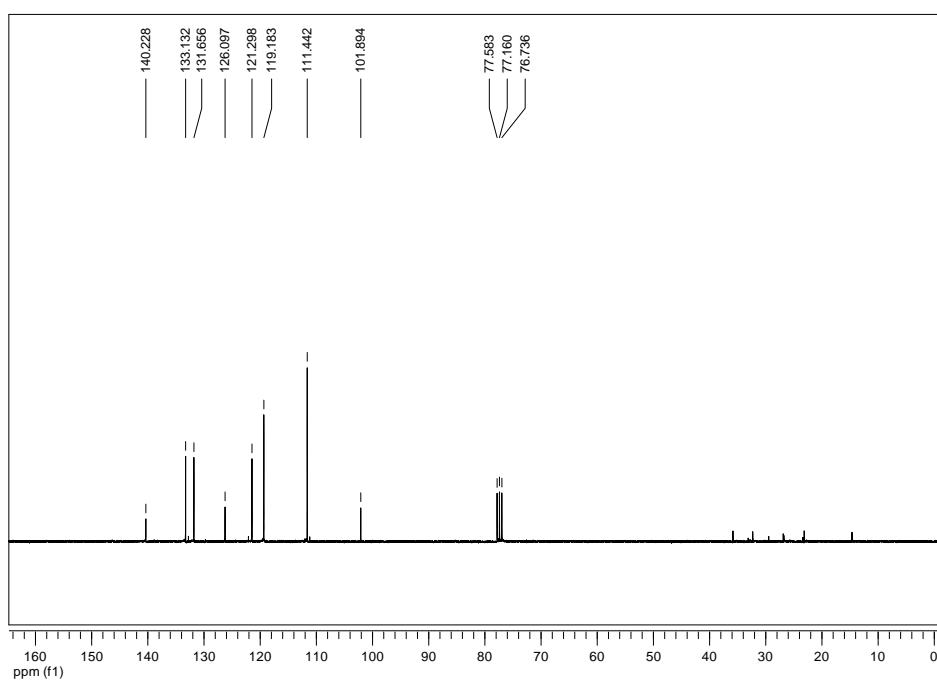

# Compound 4e

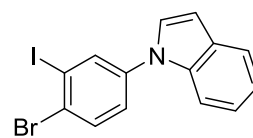

$^1\text{H}$  NMR (300 MHz,  $\text{CDCl}_3$ )

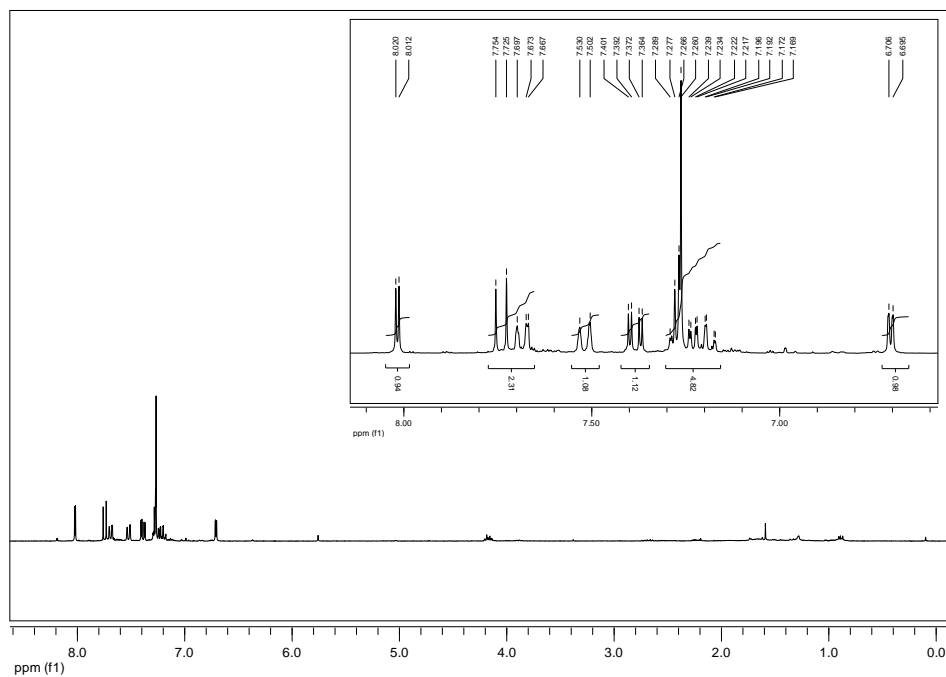

$^{13}\text{C}$  NMR (75 MHz,  $\text{CDCl}_3$ )

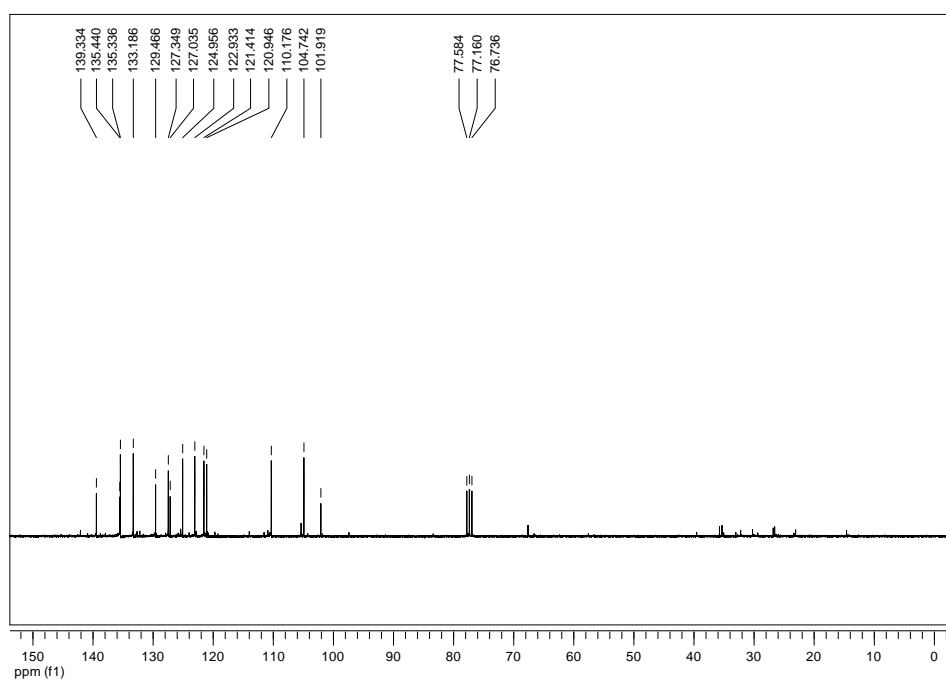

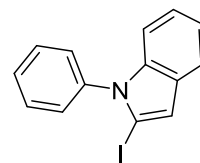

**Compound 4c**

$^1\text{H}$  NMR (300 MHz,  $\text{CDCl}_3$ )

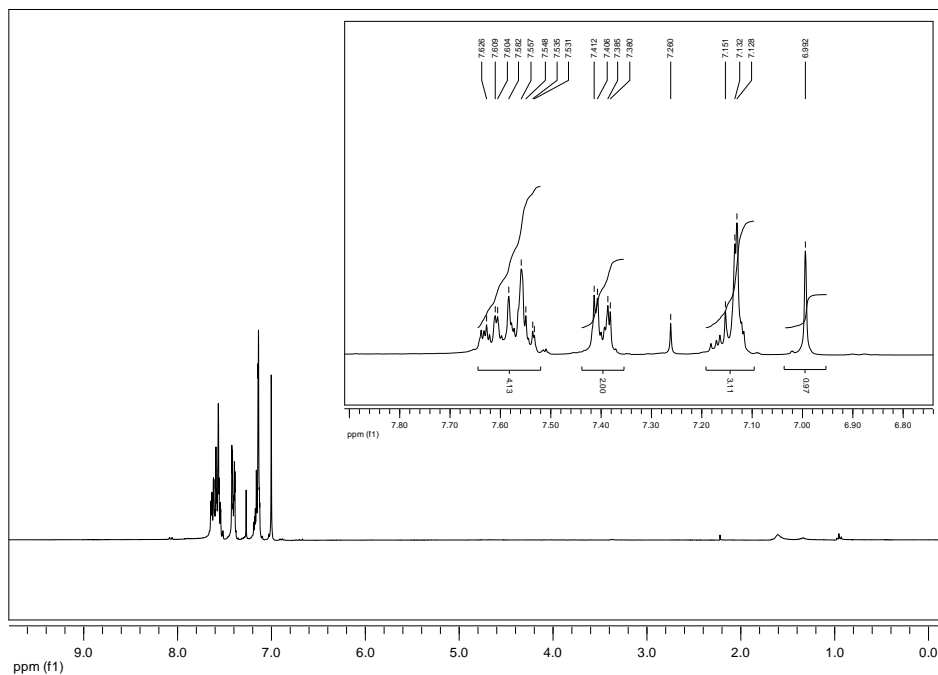

$^{13}\text{C}$  NMR (75 MHz,  $\text{CDCl}_3$ )

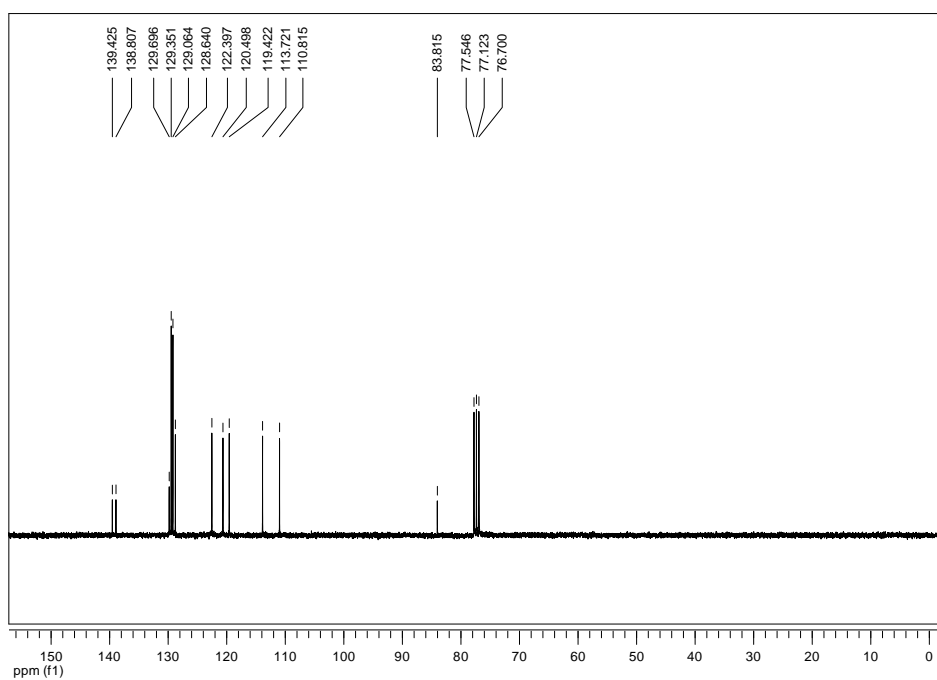



### Compound 3d

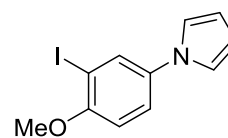

$^1\text{H}$  NMR (300 MHz,  $\text{CDCl}_3$ )

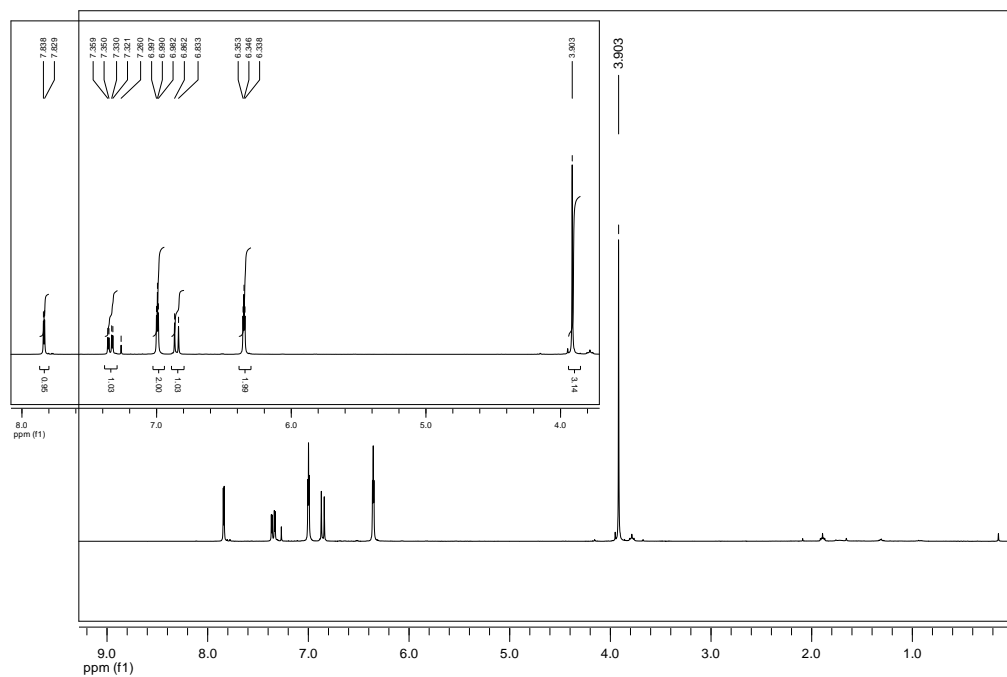

$^{13}\text{C}$  NMR (75 MHz,  $\text{CDCl}_3$ )

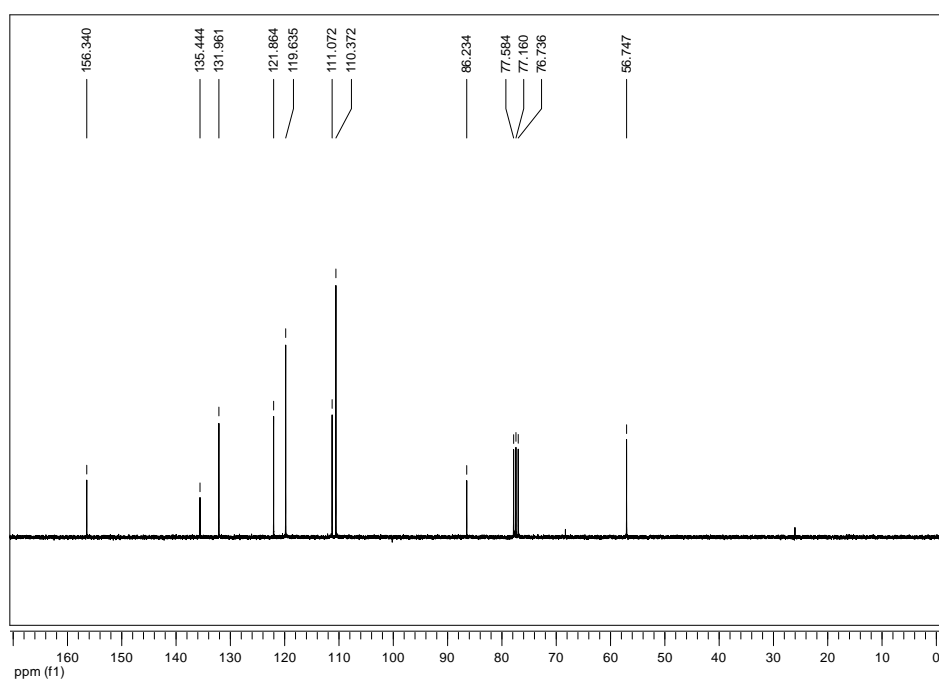

### Compound 4d

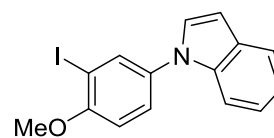

$^1\text{H NMR}$  (300 MHz,  $\text{CDCl}_3$ )

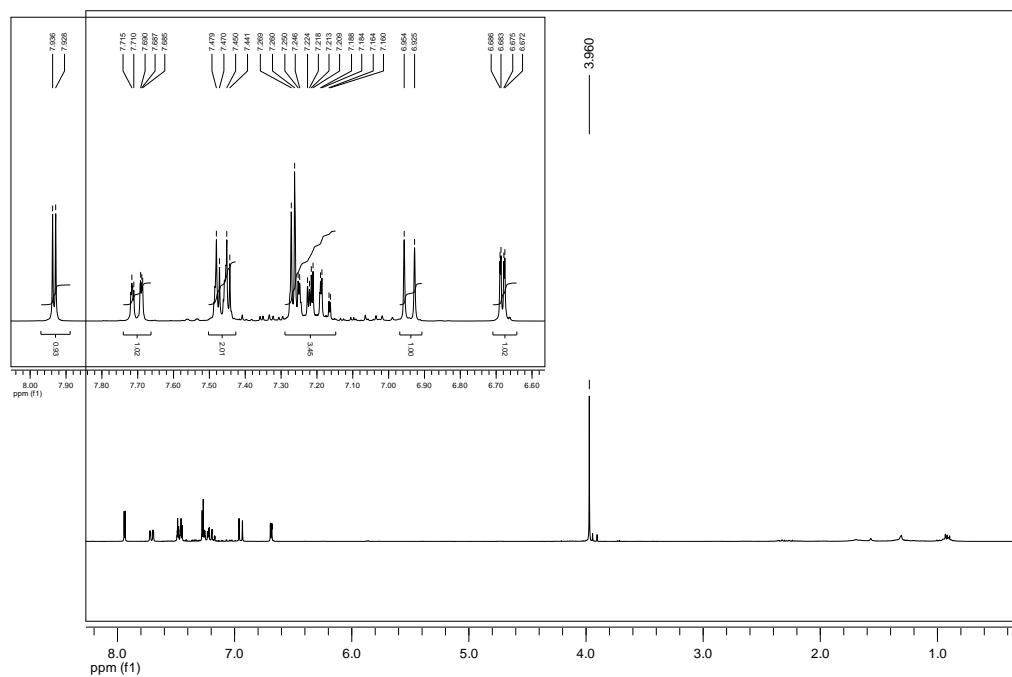

$^{13}\text{C NMR}$  (75 MHz,  $\text{CDCl}_3$ )

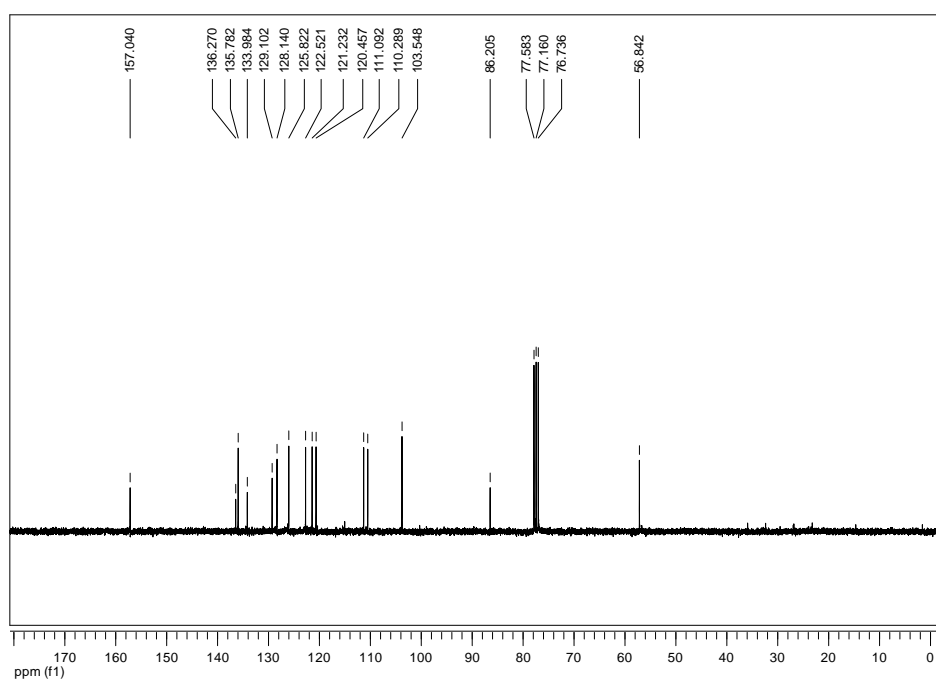

## Compound 5b

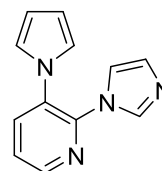

$^1\text{H}$  NMR (300 MHz,  $\text{CDCl}_3$ )

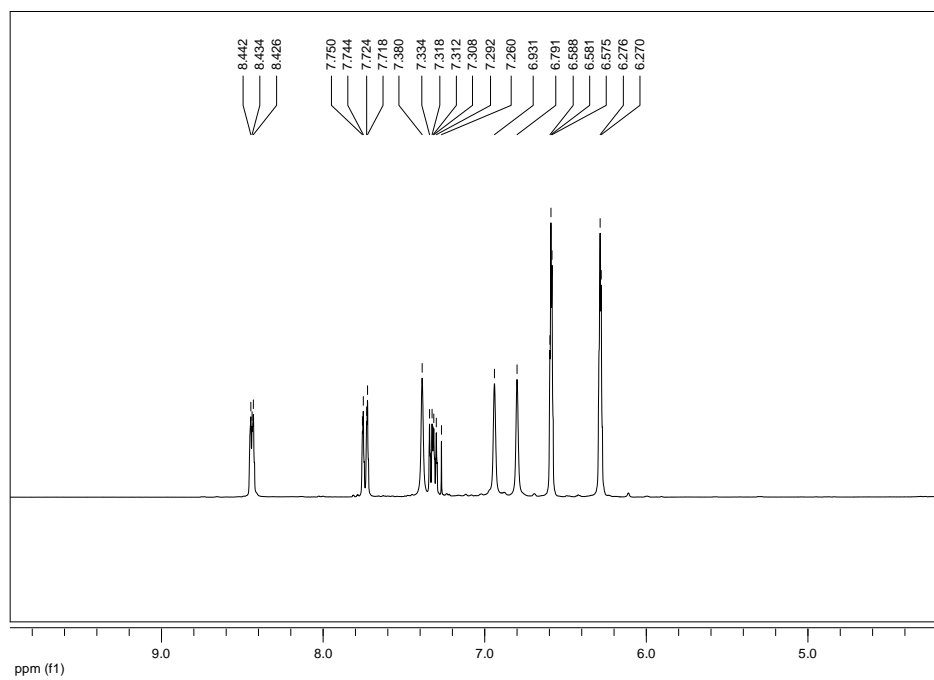

$^{13}\text{C}$  NMR (75 MHz,  $\text{CDCl}_3$ )

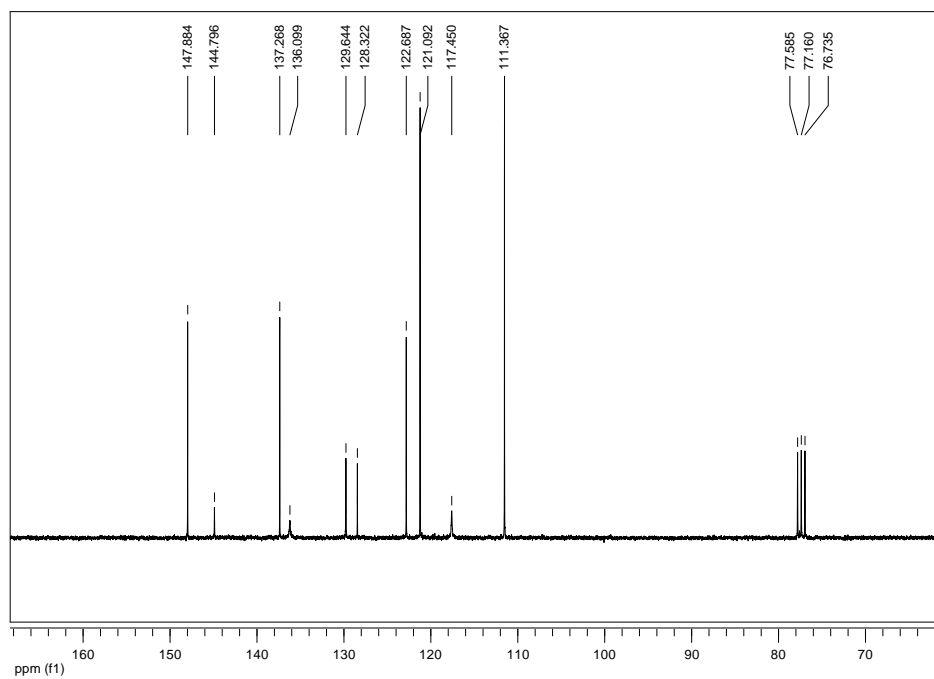

## Compound 5d

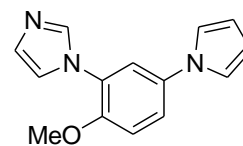

$^1\text{H}$  NMR (300 MHz,  $\text{CDCl}_3$ )

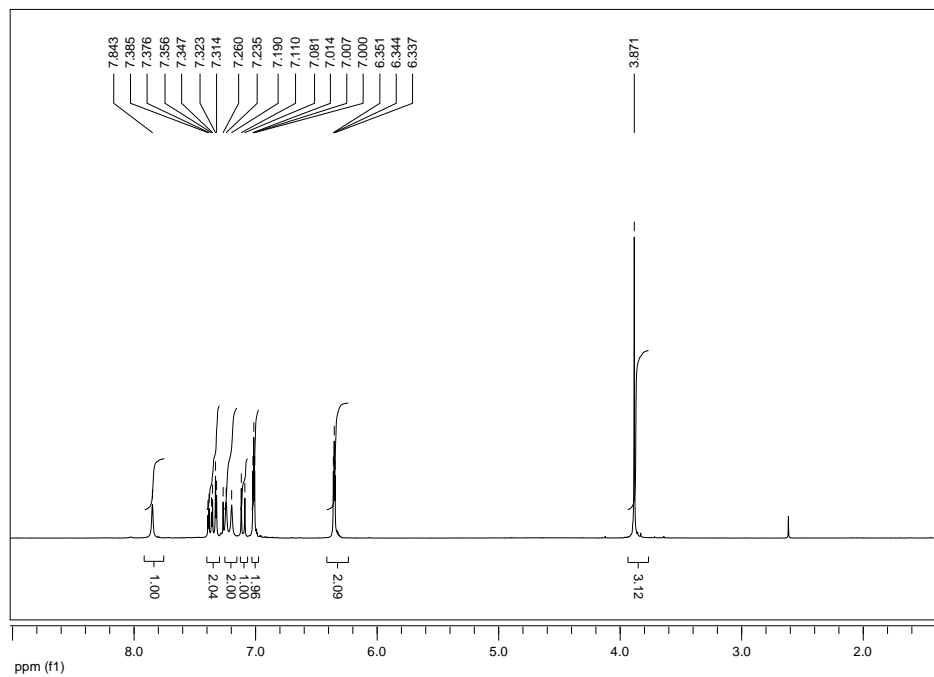

$^{13}\text{C}$  NMR (75 MHz,  $\text{CDCl}_3$ )

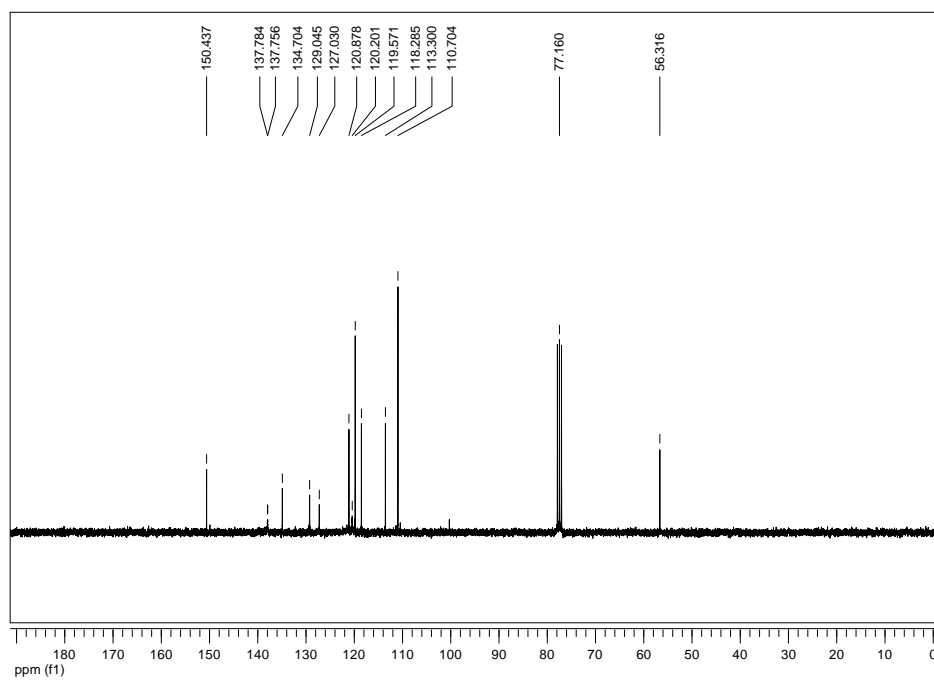

## Compound 6d

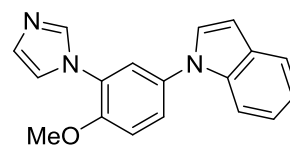

$^1\text{H}$  NMR (300 MHz,  $\text{CDCl}_3$ )

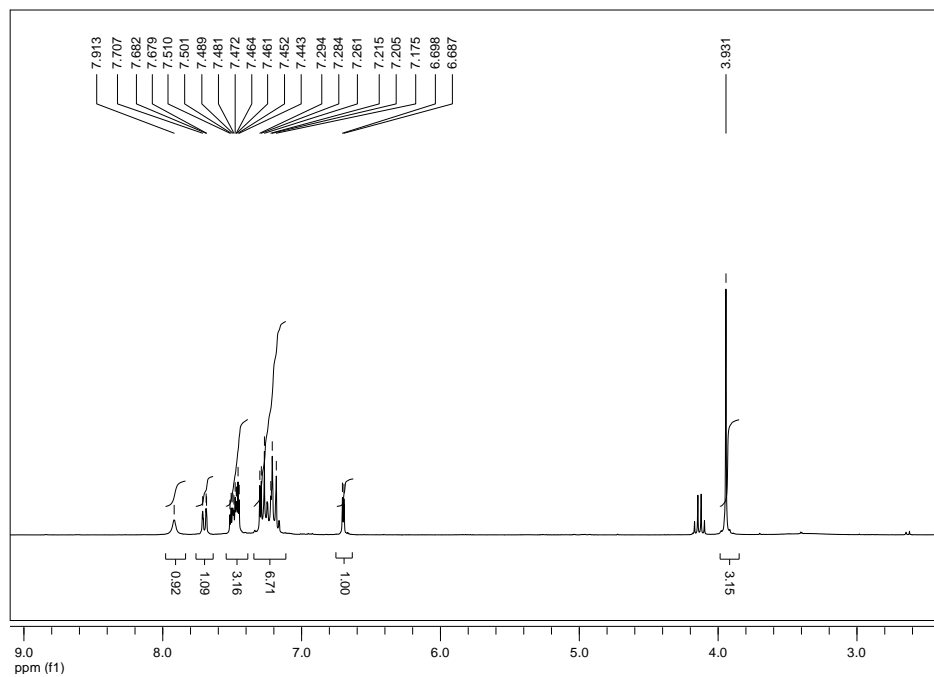

$^{13}\text{C}$  NMR (75 MHz,  $\text{CDCl}_3$ )

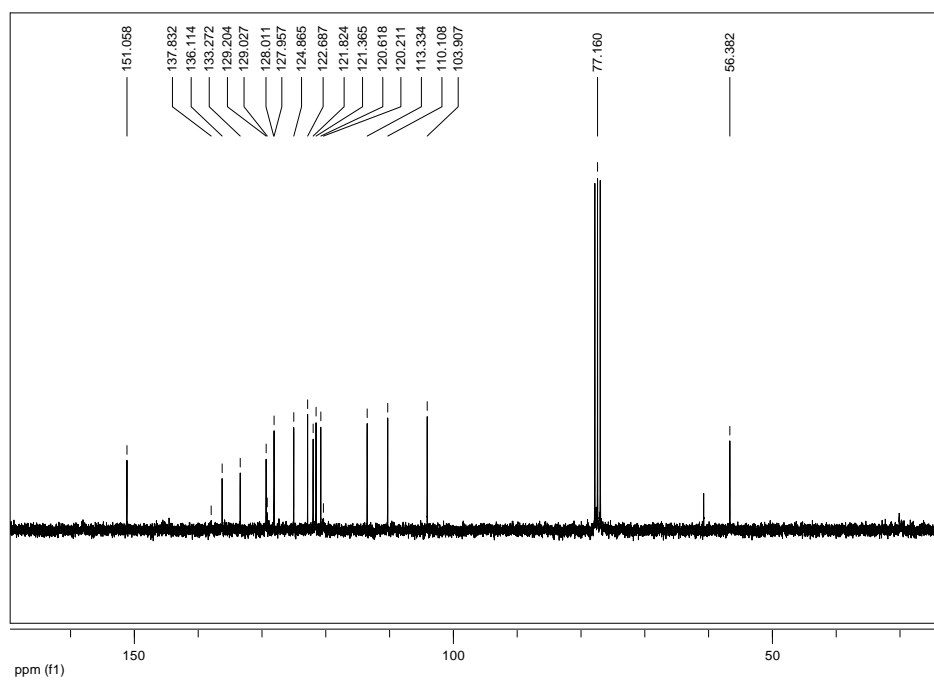

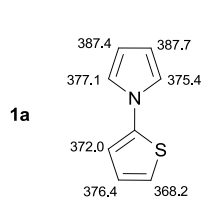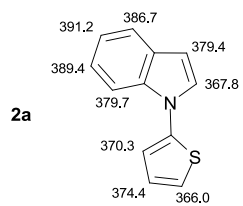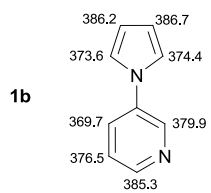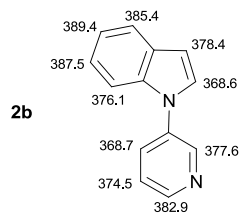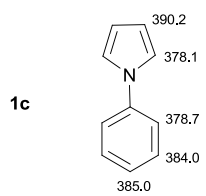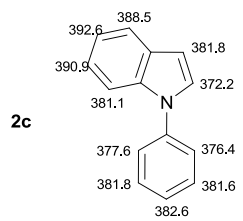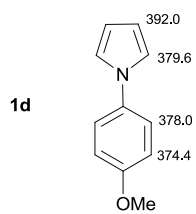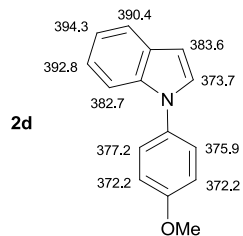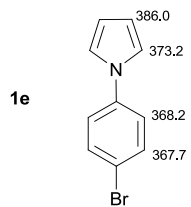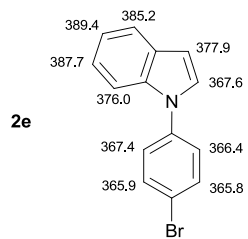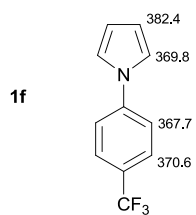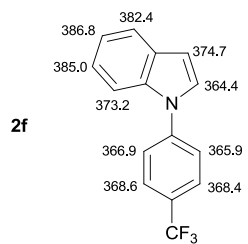

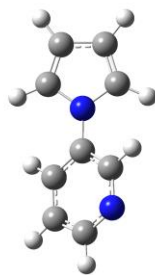

**1b**

|   |             |             |             |
|---|-------------|-------------|-------------|
| C | -2.49745668 | -0.10139721 | 0.84000820  |
| C | -1.16969012 | -0.22828081 | 0.51161267  |
| C | -0.89897597 | 0.69698878  | -0.54031589 |
| C | -2.07250987 | 1.35155123  | -0.82542282 |
| N | -3.05801946 | 0.86670142  | 0.02090394  |
| H | -3.10923691 | -0.64480414 | 1.54463141  |
| H | -0.47048172 | -0.91638816 | 0.96717689  |
| C | -4.40575778 | 1.28586004  | 0.04291307  |
| C | -5.12316711 | 1.36368761  | 1.24107552  |
| C | -5.06641676 | 1.63528461  | -1.14479323 |
| C | -6.45125886 | 1.77763551  | 1.19612548  |
| H | -4.64141801 | 1.12389719  | 2.18391205  |
| C | -7.00937595 | 2.11929394  | -0.03645569 |
| H | -7.03955760 | 1.85058216  | 2.10599111  |
| H | -2.28881605 | 2.15212453  | -1.51680592 |
| H | 0.05262872  | 0.86955601  | -1.02458023 |
| H | -4.54490663 | 1.55931099  | -2.09672128 |
| H | -8.04157986 | 2.45713411  | -0.10357005 |
| N | -6.33242017 | 2.05402791  | -1.18953785 |

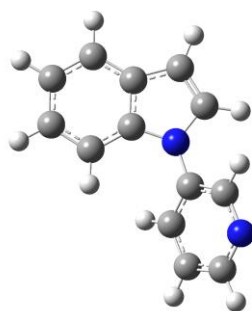

**2b**

|   |             |             |             |
|---|-------------|-------------|-------------|
| C | 0.32181200  | 2.00372700  | 0.30814300  |
| C | 1.68155500  | 2.12109600  | 0.32064600  |
| C | 2.22376400  | 0.80561800  | 0.11944200  |
| C | 1.12230700  | -0.08471100 | -0.00631800 |
| H | -0.44541500 | 2.75054300  | 0.45519600  |
| H | 2.23727700  | 3.03715900  | 0.46712000  |
| C | -1.37742300 | 0.20680300  | 0.05996700  |
| C | -1.78926800 | -0.93618700 | 0.75432500  |
| C | -2.33729700 | 0.90501300  | -0.68889300 |
| C | -3.12207200 | -1.32713500 | 0.65935600  |
| H | -1.08272900 | -1.48831700 | 1.36541800  |
| C | -3.99874900 | -0.55438300 | -0.10367300 |
| H | -3.47963900 | -2.20833200 | 1.18371900  |
| H | -2.04235800 | 1.78855400  | -1.25239200 |
| C | 1.29954500  | -1.44921200 | -0.26224000 |
| C | 3.52917600  | 0.29623400  | 0.01811700  |
| C | 3.70872900  | -1.06092100 | -0.21481900 |
| C | 2.60368500  | -1.92265800 | -0.36020900 |
| H | 4.38445700  | 0.96013700  | 0.11399800  |
| H | 4.71383000  | -1.46580600 | -0.29461400 |
| H | 2.77097200  | -2.97803100 | -0.55688000 |
| H | 0.45473800  | -2.11738100 | -0.39402000 |
| N | -0.04493000 | 0.67176600  | 0.11848300  |
| H | -5.04788600 | -0.82995300 | -0.19084000 |
| N | -3.62047400 | 0.54705200  | -0.76416500 |
